# Supplementary material for: Urea-assisted synthesis of hydroxyapatite nanorods from naturally occurring impure apatite rocks for biomedical applications
Source: Royal Society of Chemistry journal article supplement (doi:10.1039/c7ra02166f), 2017-01-01
Supplement: c7ra02166f1.pdf [file c7ra02166f1.pdf]

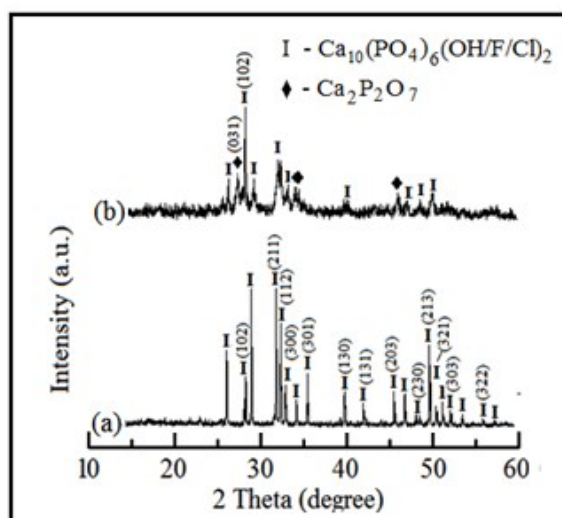

Fig. S1. XRD pattern of (a) Heat-treated NAP (b) hydrothermally treated HA products synthesized at pH 10.

**Reactions during the synthesis process of HA nanoparticles**

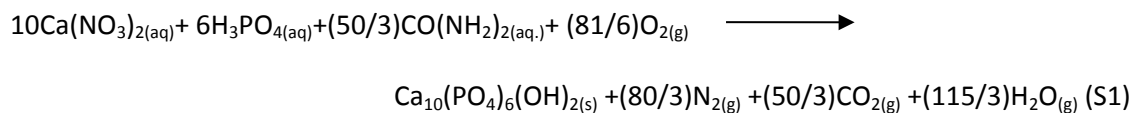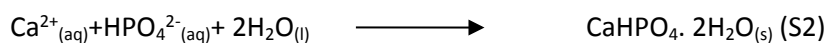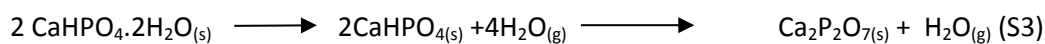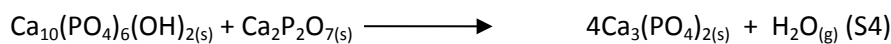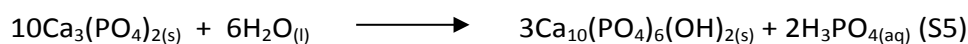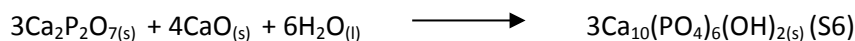

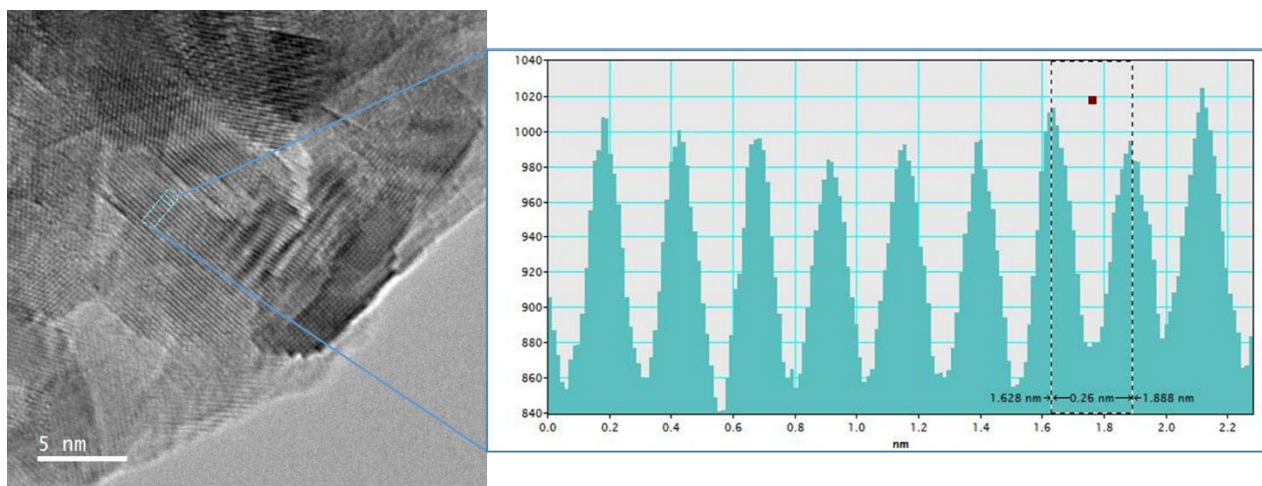

Fig. S2. HRTEM of final HA product with d-spacing
